# Supplementary material
Source: PubMed Central journal article supplement (PMC2879597)
Supplement: NIHMS192533-supplement-01.pdf [file NIHMS192533-supplement-01.pdf]

## **Supplemental Data**

**Yoon et al. Structure and Mechanism of receptor sharing by the IL-10R2 common chain**

Fig S1

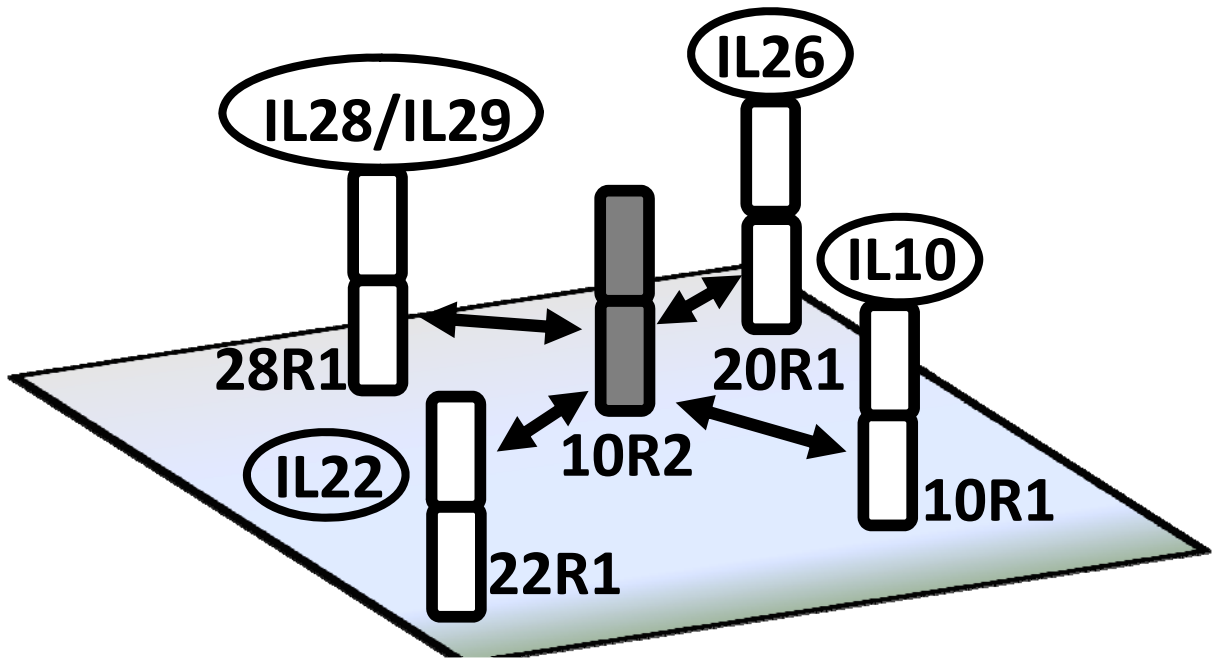

Fig S2

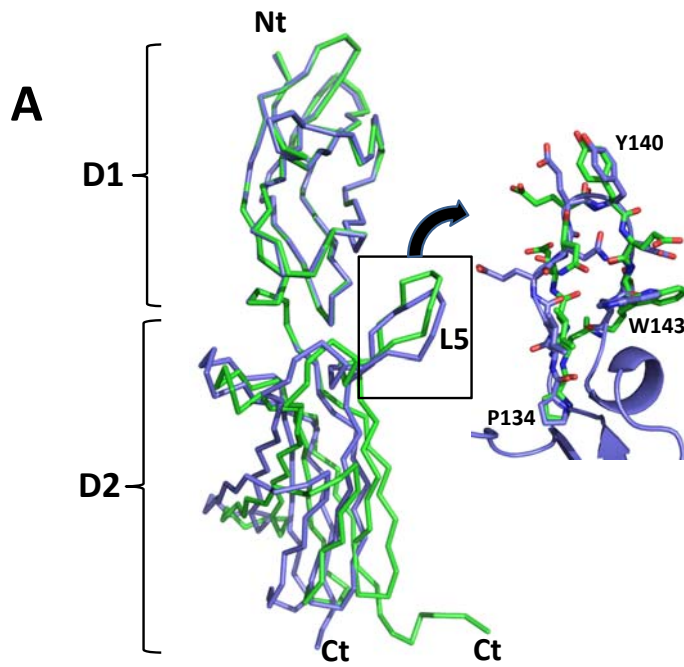

### D1-D2 Inter-domain Angles

| Receptor       | Elbow | Twist | Swivel |
|----------------|-------|-------|--------|
| 10R2 (chain A) | 95.1  | 118.3 | 126.8  |
| 10R2 (chain B) | 96.0  | 122.9 | 132.8  |
| 10R1           | 90.7  | 130.2 | 133.0  |
| 22R1 (Chain A) | 91.7  | 133.6 | 101.3  |

All angles in degrees. Definitions of each angle are described in Deivanayagam et al. (Deivanayagam et al., 1999)

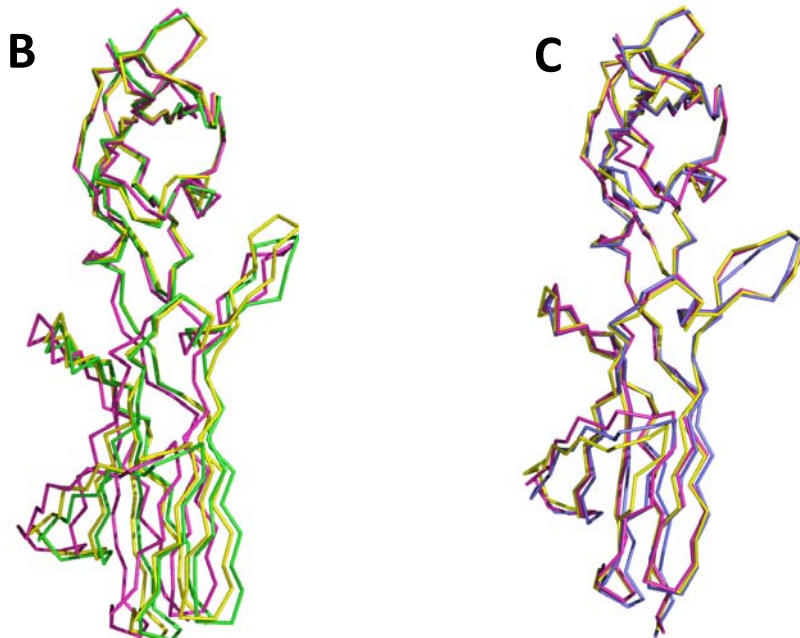

Fig S3

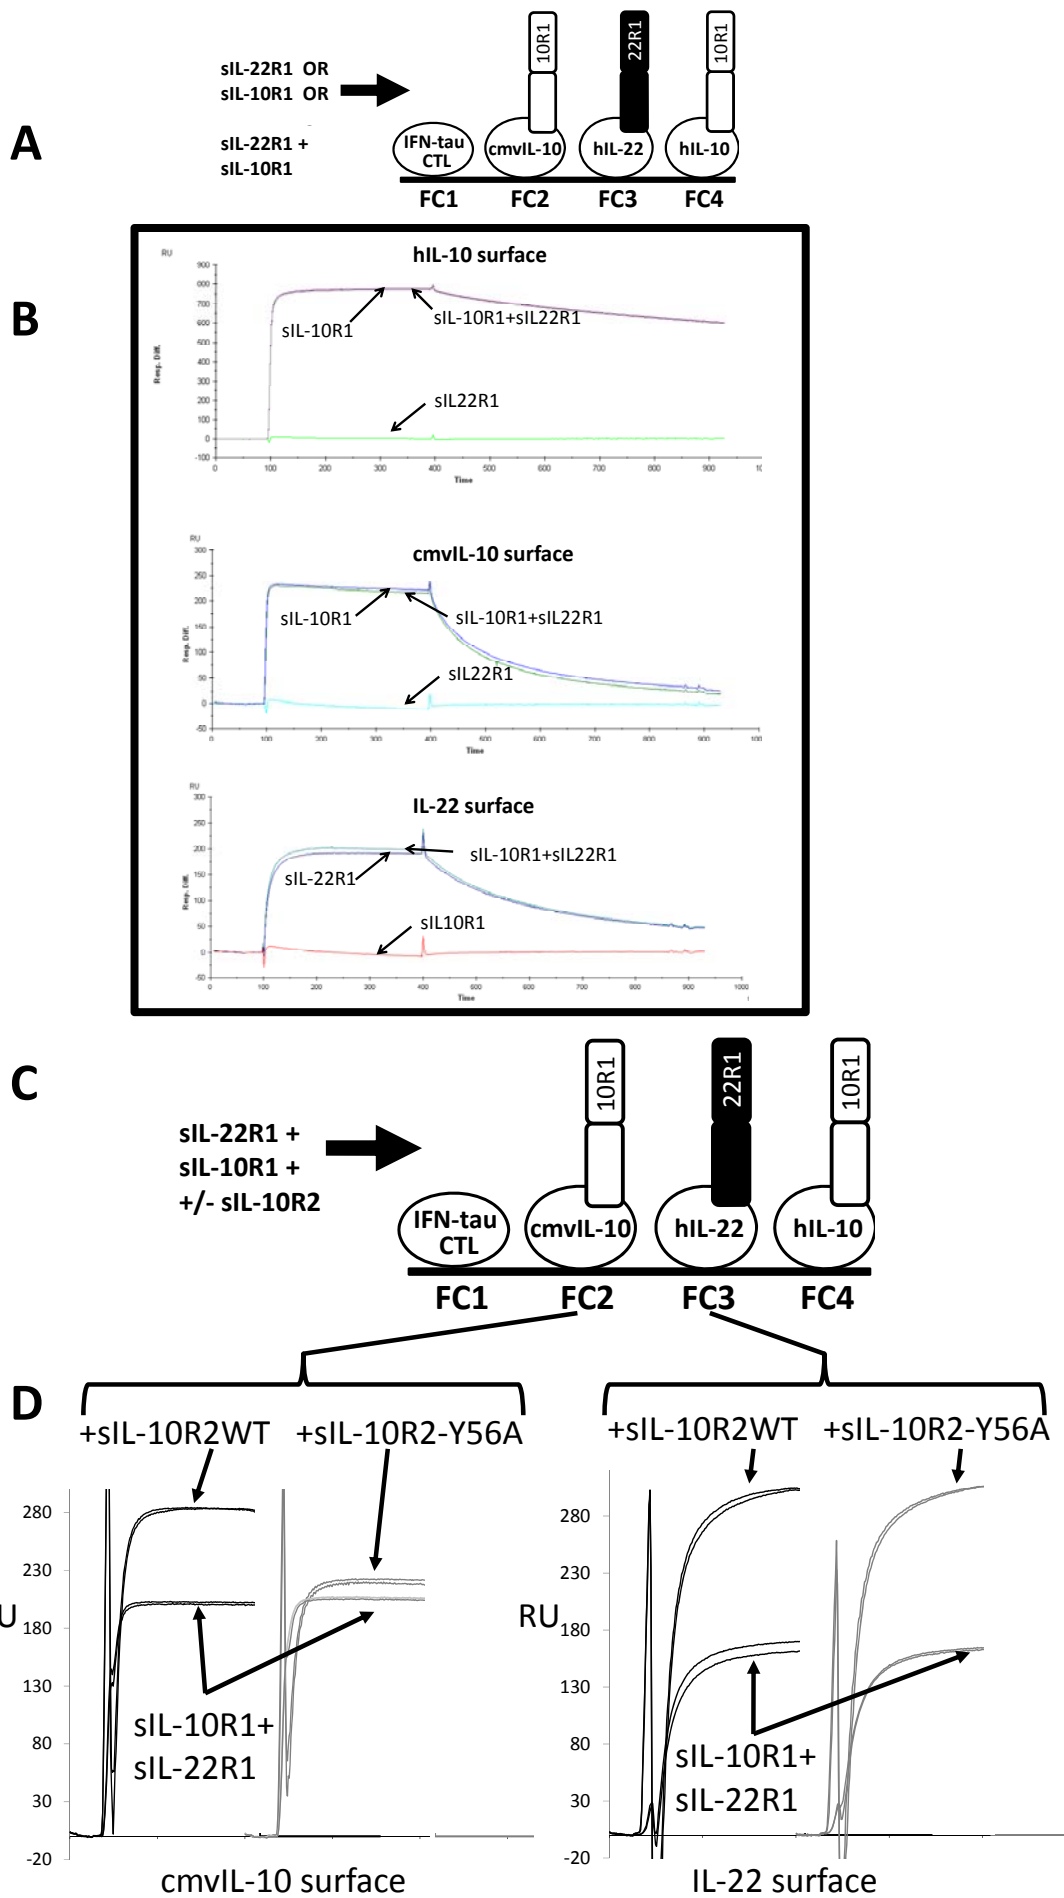

Fig S4

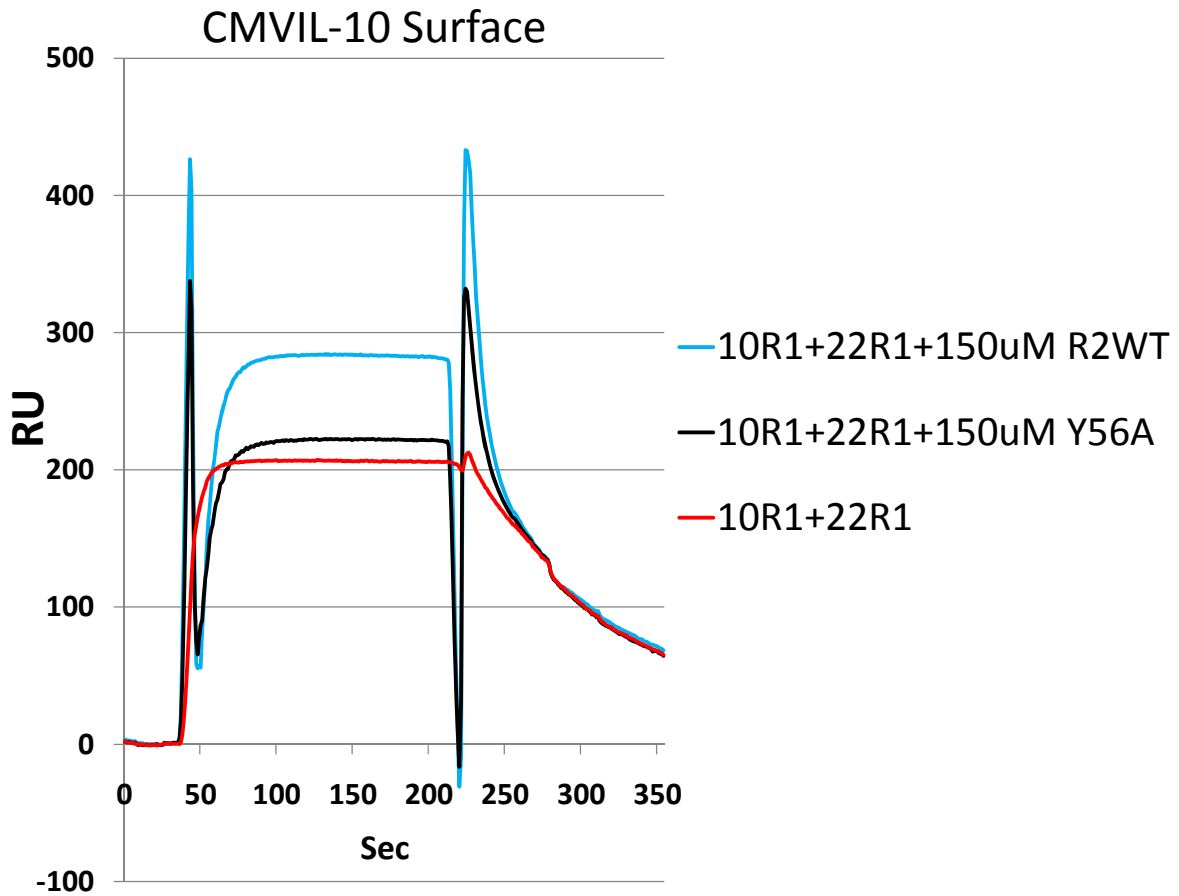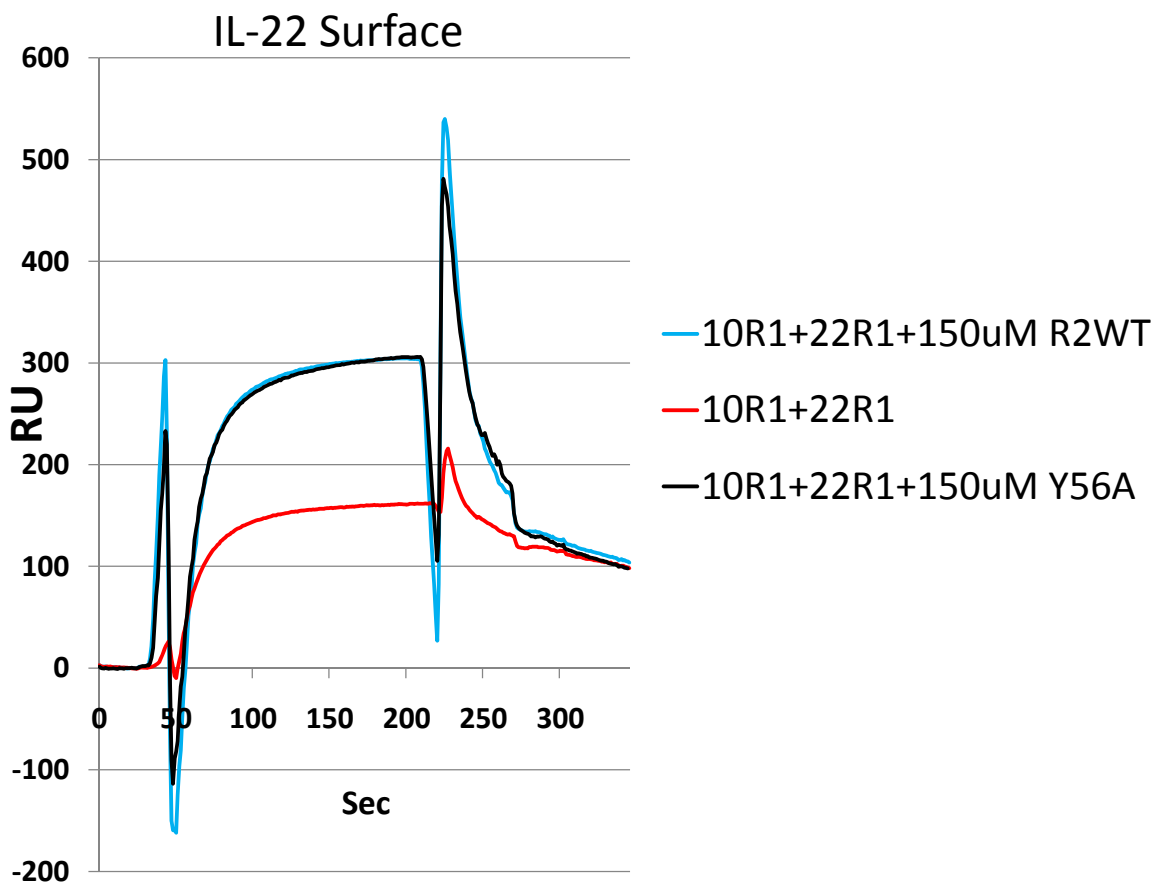

FIG S5

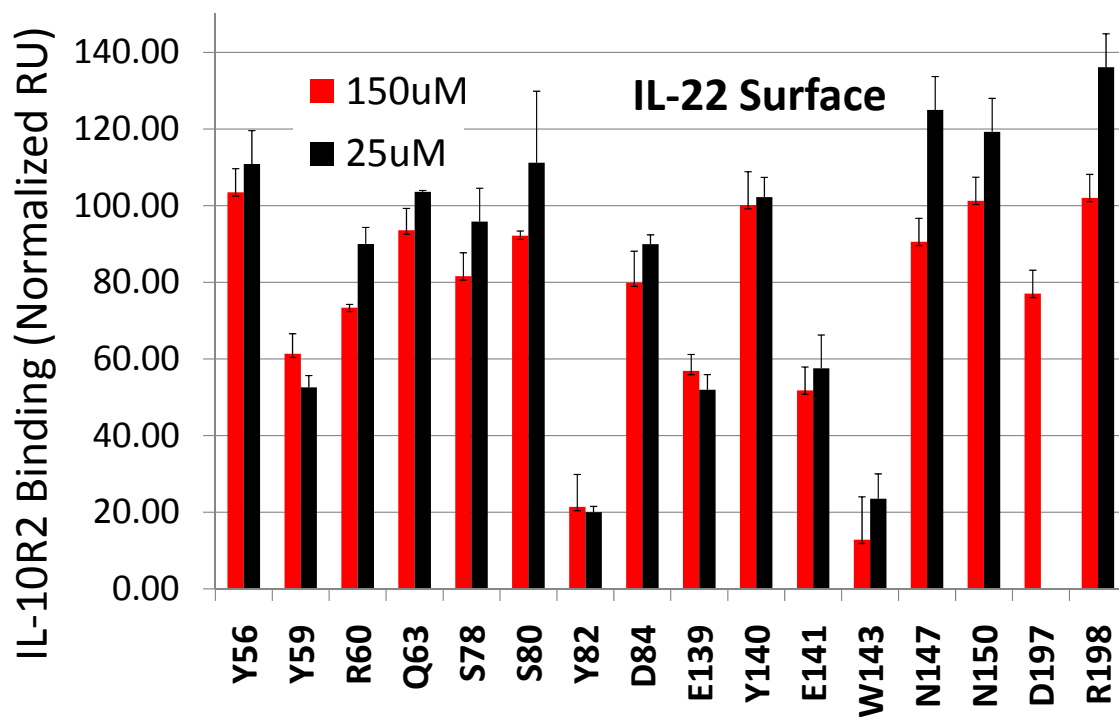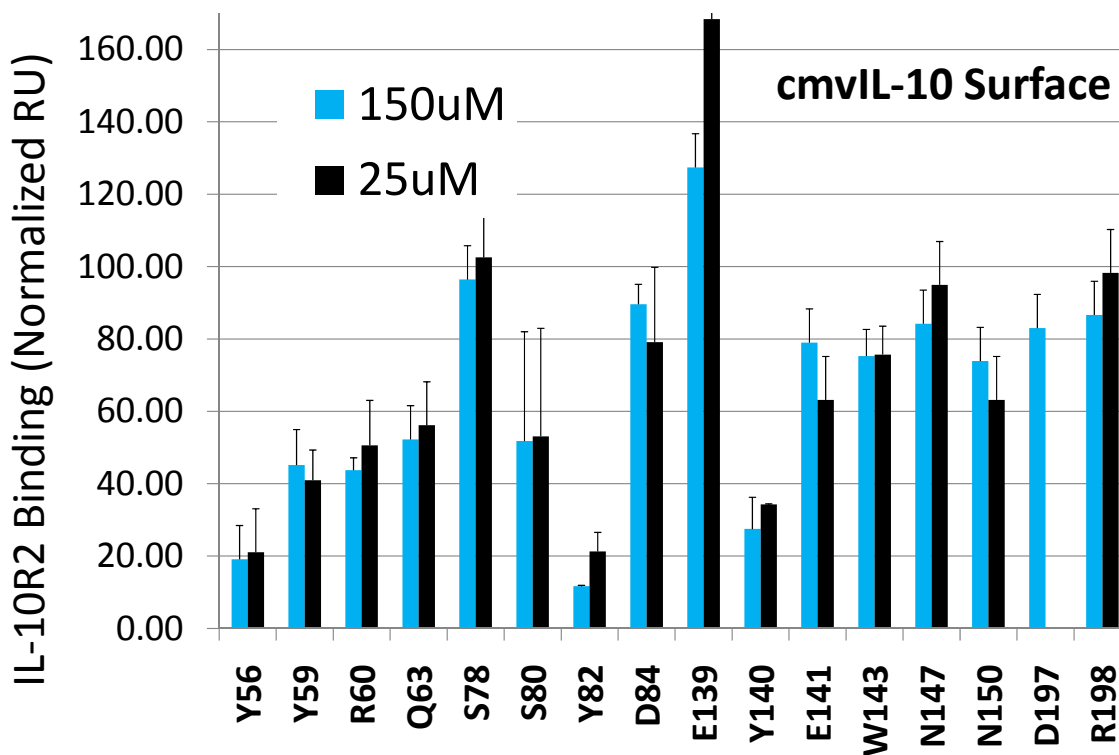

FIG S6

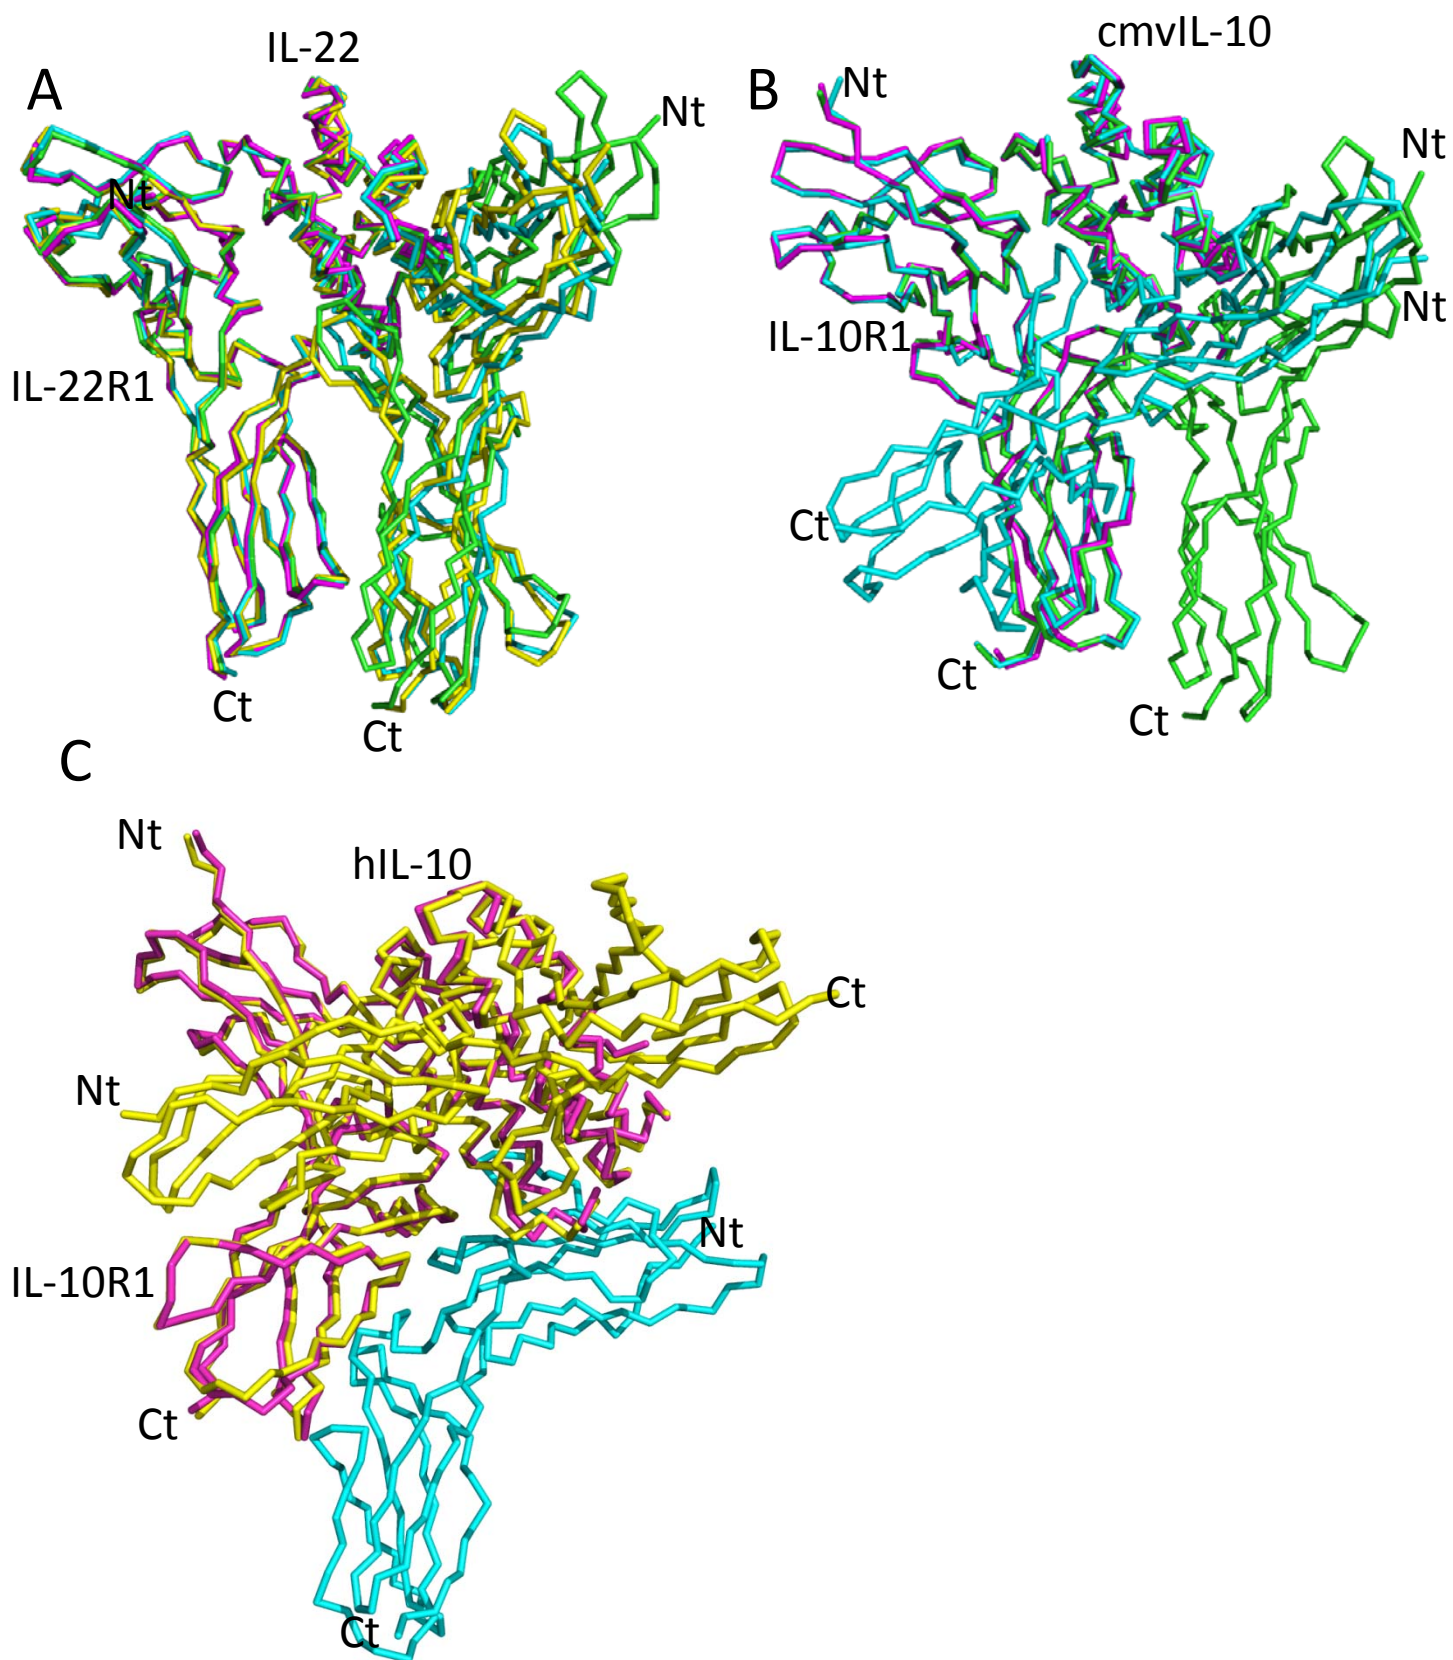

Fig S7

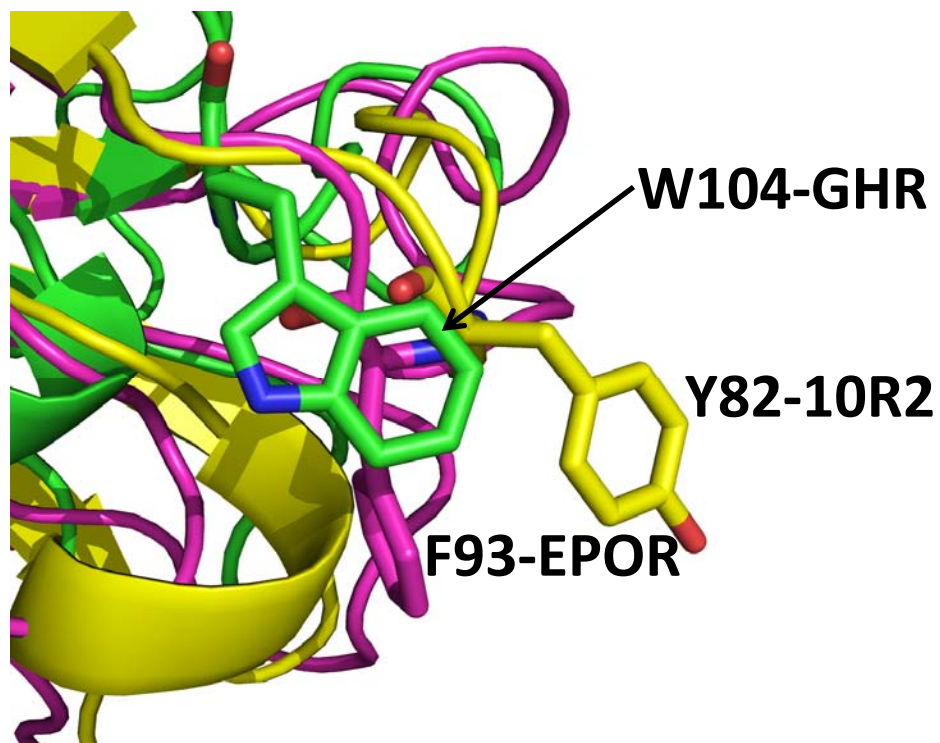



## Supplement Figure Legends

**Figure S1. Schematic diagram of sIL-10R2 receptor sharing.** Cytokines are denoted by ovals.

**Figure S2. Domain orientations of non-crystallographically related sIL-10R2 chains.** **(A)** The D1 domains of sIL-10R2 chain A (green) and chain B (purple) are shown with D1 domains superimposed (r.m.s.d. =  $0.35\text{\AA}$ ). The inset in the Figure shows the L5 loop (residues 134-143), which exhibits different conformations in chains A and B due to crystal contacts. To generate the inset figure for the L5 loop, the D2 domains of the A and B chains were superimposed (r.m.s.d =  $0.68\text{\AA}$ ). The table below Figure S2A provides a comparison of elbow, twist, and swivel angles as defined by Deivanayagam et al. (Deivanayagam et al., 2000). **(B)** D1 superposition of sIL-10R2 from IL-22 (C-A-R18-S1, yellow) and cmvIL-10 (C-A-R13-S1, magenta) ternary complexes (Table S2) onto Chain A of sIL-10R2 (green). **(C)** D1 superposition of sIL-10R2 from IL-22 (C-B-R15-S6, yellow) and cmvIL-10 (C-B-R12-S1, magenta) ternary complexes (Table S2) onto Chain B of sIL-10R2 (purple).

**Figure S3. R1 chain specificity and IL-10R2 binding analyses.** **(A)** Experimental design used to test the binding specificity of sIL-22R1 and sIL-10R1 chains for cmvIL-10, IL-22, and hIL-10 surfaces. **(B)** Sensorgrams for each surface are shown with injections of sIL-22R1, sIL-10R1, and sIL-22R1+sIL-10R1. **(C)** Schematic diagram of the IL-10R2 binding experiment. **(D)** Sensorgrams are shown for injections of sIL-10R1+sIL-22R1 +/- sIL-10R2WT or +/- sIL-10R2-Y56A over cmvIL-10 (left) and IL-22 (right) chip surfaces.

**Figure S4. Complete sensorgrams with the dissociation phase.** Sensorgrams, showing the large bulk shifts due to high sIL-10R2 protein concentration, and the off-rates of the receptors, are shown for the experiment in Figure S3D.

**Figure S5. Relative sIL-10R2 binding to IL-22 and cmvIL-10 BCs at 25 $\mu$ M and 150 $\mu$ M concentrations.**

To further validate the initial findings of the SPR study, a 25 $\mu$ M sIL-10R2 concentration (WT and mutants) was evaluated by SPR and analyzed as described for the 150 $\mu$ M concentration. No significant differences were observed between the data collected at 25 $\mu$ M and 150 $\mu$ M on the cmvIL-10 and IL-22 surfaces. The errors in the data collected on the hIL-10 surface were >55% and were not used for further analysis.

**Figure S6. Haddock sIL-10R2 docking solutions.** Alpha carbon representations of IL-22, cmvIL-10, and hIL-10 docking solutions listed in Table S2 and labeled by Chain (C), run number (R), and solution number (S) (See Table 2). IL-22/sIL-22R1, cmvIL-10/sIL-10R1, and hIL-10/sIL-10R1 crystal structures are colored magenta. **(A)** IL-22 TC docking solutions C-A-R18-S1, B-R15-S1, and C-B-R15-S6 are colored yellow, cyan, and green, respectively. **(B)** cmvIL-10 TC docking solutions C-A-R13-S1 and C-B-R12-S1 are colored cyan and green, respectively. **(C)** Best Haddock score solutions from the hIL-10 docking experiments. C-A-R22-S1 and C-B-R21-S1 are colored cyan and yellow, respectively.

**Figure S7. Comparison of sIL-10R2-D1-Y82 with EPOR and growth hormone receptor (GHR).** Close up view of IL-10R2 D1 (yellow), EPOR (magenta), and GHR (green) showing structural divergence of F93<sup>EPOR</sup> and W104<sup>GHR</sup> from sIL-10R2 Y82.

**Table S1. Haddock AIR restraints.**

| IL-22BC* |     | sIL-10R2 |      | cmvIL-10BC** |     | sIL-10R2 |      | hIL-10BC*** |     | sIL-10R2 |      |
|----------|-----|----------|------|--------------|-----|----------|------|-------------|-----|----------|------|
| A        | P   | A        | P    | A            | P   | A        | P    | A           | P   | A        | P    |
| Y51      | M58 | Y59      | R60  | Q24          | D25 | Y56      | E141 | R24         | N21 | Y56      | D84  |
| N54      | K61 | Y82      | S80  | R32          | V28 | Y59      | N150 | R32         | D25 | Y59      | E141 |
| R55      | E62 | E139     | D84  |              | T29 | R60      | D197 |             | D28 | R60      | N150 |
| Y114     |     | E141     | D109 |              | S93 | Q63      | R198 |             | T31 | Y82      | D197 |
| E117     |     | W143     | Y140 |              |     | S80      |      |             | S93 | Y140     | R198 |
|          |     | Y173     | N150 |              |     | Y82      |      |             |     | W143     |      |
|          |     |          | D197 |              |     | Y140     |      |             |     |          |      |
|          |     |          | R198 |              |     |          |      |             |     |          |      |

A = Active residues, P = Passive residues, BC=binary complex. IL-22BC, cmvIL-10BC, hIL-10BC correspond to pdbids 3DGC, 1LQS, and 1Y6K, respectively.

**Table S2. Haddock Docking Solutions.**

| Binary Complex       | R2 Chain | run#      | # of clusters* | cluster # | #strucs in cluster | Solut. #** | Haddock score | r.m.s.d. BC*** | r.m.s.d. R2 | C-term dist (Å)**** | buried surface (Å <sup>2</sup> ) |
|----------------------|----------|-----------|----------------|-----------|--------------------|------------|---------------|----------------|-------------|---------------------|----------------------------------|
| IL-22/IL-22R1        | A        | 18        | 4              | 1         | 180                | 1          | -166.6        | 0.74           | 0.84        | 29.1                | 1,214                            |
| IL-22/IL-22R1        | B        | 15        | 6              | 2         | 34                 | 1          | -152.3        | 0.78           | 0.85        | 30.4                | 1,132                            |
| <b>IL-22/IL-22R1</b> | <b>B</b> | <b>15</b> | <b>6</b>       | <b>4</b>  | <b>19</b>          | <b>6</b>   | <b>-123.4</b> | <b>0.67</b>    | <b>0.85</b> | <b>35.2</b>         | <b>1,225</b>                     |
| cmv10/IL-10R1        | A        | 13        | 11             | 1         | 84                 | 1          | -110.9        | 0.68           | 0.92        | 48.7                | 1,092                            |
| <b>cmv10/IL-10R1</b> | <b>B</b> | <b>12</b> | <b>10</b>      | <b>1</b>  | <b>55</b>          | <b>1</b>   | <b>-178.2</b> | <b>0.64</b>    | <b>0.85</b> | <b>22.6</b>         | <b>1,539</b>                     |
| hIL-10/IL-10R1       | A        | 22        | 16             | --        | 1                  | 1          | -138.7        | 1.05           | 0.85        | 33.4                | 1,130                            |
| hIL-10/IL-10R1       | B        | 21        | 14             | --        | 1                  | 1          | -124.8        | 0.98           | 0.8         | 94.2                | 1,219                            |

\* Total # of clusters for a given run using a 7.5Å cut off and requiring at least 4 structures to form a cluster.

\*\* Overall ranking of the solution based on Haddock Score

\*\*\* BC = binary complex. r.m.s.d. for Ca atoms, relative to crystal structures

\*\*\*\* distance between C-terminal residues IL-10R1 Cα T206/IL-10R2 Cα T194 or IL-22R1 Cα L222 /IL-10R2 Cα T194

Bolded solutions described in more detail in the text. Graphical comparison of solutions shown in Fig S6.

Surface area buried by sIL-10R2 into the IL-22/sIL-22R1 and cmvIL-10/sIL-10R1 complexes.

**Table S3. Hydrogen bonds\* in the IL-22 and cmvIL-10 ternary complexes (TCs).**

| Chain B-R15-S6 |     |     |      |               |     |     |     | Chain B-R12-S1 |          |     |      |      |                  |     |     |     |     |
|----------------|-----|-----|------|---------------|-----|-----|-----|----------------|----------|-----|------|------|------------------|-----|-----|-----|-----|
| sIL-10R2       |     |     |      | IL-22/IL-22R1 |     |     |     | D              | sIL-10R2 |     |      |      | cmvIL-10/IL-10R1 |     |     |     | D   |
|                |     |     |      |               |     |     |     |                | 56       | TYR | OH   | .... |                  | 89  | THR | O   | 2.9 |
|                |     |     |      |               |     |     |     |                | 59       | TYR | OH   | .... |                  | 99  | GLU | OE1 | 2.9 |
| 63             | GLN | NE2 | .... | 109           | ASP | OD2 | 2.9 |                |          |     |      |      |                  |     |     |     |     |
| 78             | SER | OG  | .... | 116           | GLN | OE1 | 2.9 |                |          |     |      |      |                  |     |     |     |     |
| 80             | SER | OG  | .... | 116           | GLN | O   | 2.6 | 80             | SER      | OG  | .... |      | 93               | SER | O   | 2.8 |     |
|                |     |     |      |               |     |     |     | 80             | SER      | OG  | .... |      | 97               | THR | OG1 | 3.2 |     |
| 81             | LYS | N   | .... | 117           | GLU | OE1 | 2.8 | 81             | LYS      | N   | .... |      | 25               | ASP | OD2 | 2.6 |     |
|                |     |     |      |               |     |     |     | 81             | LYS      | NZ  | .... |      | 25               | ASP | OD1 | 2.6 |     |
|                |     |     |      |               |     |     |     |                |          |     |      |      |                  |     |     |     |     |
|                |     |     |      |               |     |     |     | 85             | HIS      | NE2 | .... |      | 96               | SER | OG  | 3   |     |
| 128            | HIS | ND1 | .... | 173r          | ARG | O   | 3   | 128            | HIS      | ND1 | .... |      | 174r             | SER | OG  | 2.8 |     |
|                |     |     |      |               |     |     |     |                |          |     |      |      |                  |     |     |     |     |
| 137            | GLU | O   | .... | 51            | TYR | OH  | 2.8 |                |          |     |      |      |                  |     |     |     |     |
|                |     |     |      |               |     |     |     |                |          |     |      |      |                  |     |     |     |     |
| 139            | GLU | OE1 | .... | 55            | ARG | NH1 | 2.7 | 139            | GLU      | OE1 | .... |      | 32               | ARG | NE  | 2.7 |     |
| 139            | GLU | OE1 | .... | 55            | ARG | NH2 | 3.2 |                |          |     |      |      |                  |     |     |     |     |
| 139            | GLU | OE2 | .... | 114           | TYR | OH  | 2.7 |                |          |     |      |      |                  |     |     |     |     |
| 141            | GLU | OE1 | .... | 54            | ASN | ND2 | 3   | 141            | GLU      | OE1 | .... |      | 187r             | SER | OG  | 2.6 |     |
|                |     |     |      |               |     |     |     | 141            | GLU      | OE1 | .... |      | 163r             | LYS | NZ  | 2.7 |     |
|                |     |     |      |               |     |     |     | 141            | GLU      | OE2 | .... |      | 185r             | LYS | NZ  | 2.6 |     |
|                |     |     |      |               |     |     |     | 142            | THR      | O   | .... |      | 163r             | LYS | NZ  | 3.1 |     |
|                |     |     |      |               |     |     |     | 147            | ASN      | OD1 | .... |      | 163r             | LYS | NZ  | 2.9 |     |
|                |     |     |      |               |     |     |     | 147            | ASN      | ND2 | .... |      | 145r             | GLU | OE1 | 2.7 |     |
|                |     |     |      |               |     |     |     | 150            | ASN      | ND2 | .... |      | 18               | ASP | OD2 | 3   |     |
| 173            | TYR | OH  | .... | 168r          | GLU | OE1 | 2.7 |                |          |     |      |      |                  |     |     |     |     |
| 173            | TYR | OH  | .... | 178r          | HIS | ND1 | 2.7 | 174            | ASP      | OD2 | .... |      | 162r             | LYS | NZ  | 2.7 |     |

\* hydrogen bonds calculated with hbplus (McDonald and Thornton, 1994). D = distance in Å, “r” distinguishes receptor residues from ligand residues in the BCs.

**Table S4. Summary of final\* IL-22 and cmvIL-10 TCs.**

|                     | IL-22TC        |                | cmvIL-10TC     |               |
|---------------------|----------------|----------------|----------------|---------------|
|                     | buried surface | # of H-bonds** | buried surface | # of H-bonds* |
| sIL-10R2 L2         | 280            | 1              | 346            | 2             |
| sIL-10R2 L3         | 280            | 3              | 280            | 5             |
| sIL-10R2 L5         | 350            | 5              | 546            | 8             |
| sIL-10R2 : cytokine | 910            | 9              | 835            | 8             |
| sIL-10R2:R1 chain   | 315            | 3              | 705            | 7             |
| Site 1***           | 808            | 12             | 990            | 16            |
| Site 2              | 910            | 9              | 1172           | 15            |
| Site 3              | 315            | 3              | 368            | 2             |
| Site 2 + Site 3     | 1225           | 12             | 1540           | 17            |

\* bolded complexes in Table S2

\*\* hydrogen bonds calculated with hbplus (McDonald and Thornton, 1994)

\*\*\* From reference Jones et al., 2008

## Supplemental Experimental Procedures

### SPR studies.

SPR studies were performed as previously described by Yoon et al. (Yoon et al., 2006) except sIL-10R1 and sIL-22R1 were mixed together prior to injection over CM-5 chip surfaces coupled with IL-22, cmvIL-10, and hIL-10 (Fig S3). To ensure sIL-10R1 and sIL-22R1 were specific, solutions of 500nM sIL-22R1, 1 $\mu$ M sIL-10R1 and 500nM sIL-22R1+ 1 $\mu$ M sIL-10R1 were injected over the CM-5 chips coupled with IL-22, cmvIL-10, and hIL-10 as shown in Figure S3B. These experiments validated that equivalent RU values (e.g. sIL-10R1 vs. sIL-10R1+sIL-22R1 on the cmvIL-10 and hIL-10 surfaces) could be obtained using mixtures of sIL-10R1 and sIL-22R1. This allowed us to characterize sIL-10R2 alanine mutants to multiple binary complexes at the same time, as shown in Figure S3C and S3D. The complete sensorgrams for sIL-10R2 and Y56A, showing the dissociation of the receptors from the surface, is shown in Figure S4. To ensure the high concentrations of sIL-10R2 used in the experiments did not cause artifacts, the data shown in Figure 3 was re-collected at sIL-10R2 concentrations of 25 $\mu$ M. Error estimates for this dataset were 9%, 13% and >55% for IL-22, cmvIL-10, and hIL-10 chip surfaces, respectively. As seen in Figure S5, there is no significant difference in the IL-22 and cmvIL-10 data collected at 150 $\mu$ M and 25 $\mu$ M.

### Haddock Docking Studies.

The two sIL-10R2 chains in the asymmetric unit of the crystals exhibit D1-D2 inter-domain angles that differ as described in Figure S2. Thus, docking studies were performed using chain A and chain B (Table S2). Ambiguous interaction restraints (AIRs, Table S1) were generated from the mutagenesis data. In addition, mainchain conformational variation of the cytokine/R1 binary complexes (IL-22/sIL-22R1 (pdbid 3DGC, chains L/R), cmvIL-10/sIL-10R1 (pdbid 1LQS, chains L/R) and hIL-10/sIL-10R1 (1Y6K)) was minimized by using unambiguous distance restraints. Unambiguous restraints for hIL-10/sIL-10R1 consisted of C $\alpha$  distances between D142<sup>hIL-10</sup> and every other C $\alpha$  atom in the hIL-10/sIL-10R1 complex. Similarly, E142<sup>cmvIL-10</sup> and E166<sup>IL-22</sup> were used to generate equivalent distance restraint tables for cmvIL-10/sIL-10R1 and IL-22/sIL-22R1 complexes, respectively. Only 1/2 of the cmvIL-10/sIL-10R1 and hIL-10/sIL-10R1 dimeric complexes (e.g. 1 domain of IL-10 and 1 sIL-10R1 chain) were used for all docking studies except one experiment using the full hIL-10 dimer and one sIL-10R1 as noted in the text.

IL-10R2 docking solutions output by HADDOCK were clustered to identify structurally equivalent solutions. As shown in Table S2, solutions formed 4 to 16 clusters depending on the binary complex used in the experiment. Individual clusters were analyzed for three main criteria. First, correct solutions were required to have the sIL-10R2 C-terminus oriented towards the putative position of the cell membrane and < 40 $\text{\AA}$  from the C-terminus of the sIL-22R1 or sIL-10R1 chain. Second, correct solutions were expected to have low HADDOCK scores (e.g. top ranking solutions) in a given experiment. Finally, structures passing these requirements were further characterized by computer graphics to determine the docking solution most consistent with the mutagenesis data in Figure 3 and previously described in the literature (Logsdon et al., 2004; Wolk et al., 2004; Wu et al., 2008; Yoon et al., 2006). For example, if a residue important for sIL-10R2 binding did not participate in any contacts with cytokine or R1 chain, this solution was considered inferior to other possible solutions.

The top ranked docking solutions for each binary complex is shown in Figure S6. Essentially equivalent docking solutions, with low Haddock scores, were obtained when sIL-10R2 chain A, or chain B, was docked onto IL-22/sIL-22R1 (Table S2, Fig S6). An additional distinct solution formed a separate cluster (cluster 4) that contained the sixth overall best HADDOCK score (Table S2). These three structures (Chain (C-) A, Run (-

R) 18, solution (-S) 1, C-B-R15-S1, and C-B-R15-S 6) were evaluated in more detail. Graphical analyses of these complexes argued that C-B-R15-S6 provided the best overall fit to the mutagenesis data. In particular, Y59<sup>sIL-10R2</sup> and R60<sup>sIL-10R2</sup> form more extensive contacts with IL-22 than in the other complexes. E141<sup>sIL-10R2</sup> forms direct hydrogen bonds with N54<sup>IL-22</sup>, whereas no contacts with N54<sup>IL-22</sup> are observed in the other solutions. Finally, Y173<sup>sIL-10R2</sup> forms an extensive hydrogen bond network in C-B-R-15-S6, which is consistent with the reduced binding properties of Y173A<sup>sIL-10R2</sup> for IL-22/sIL-22R1.

In contrast to experiments performed with IL-22/sIL-22R1, sIL-10R2 docking to cmvIL-10/sIL-10R1 identified a single solution, found only using chain B, which fit the evaluation criteria (C-B-R12-S1, Fig S6, Table S2). Not only was the cmvIL-10/sIL-10R1/sIL-10R2 C-B-R12-S1 structure consistent with the sIL-10R2 mutagenesis data, but it also shares similar contacts when compared to the IL-22 ternary complex docking solution, C-B-R15-S6. In particular, Y59<sup>sIL-10R2</sup> forms similar contacts with helix D in both complexes and R60<sup>sIL-10R2</sup> is positioned to form salt bridges with conserved glutamate residues (E101<sup>IL-22</sup> and E74<sup>cmvIL-10</sup>) in each complex. For IL-22/sIL-22R1 and cmvIL-10/sIL-10R1, the best solutions were both obtained from docking experiments performed with sIL-10R2 chain B. The D1/D2 inter-domain angles differ as described in Figure S2 between the non-crystallographic chains (chain A and B). In Figure S2, we also compare the domain angles of the IL-10R2 chains A and B against the final IL-10R2 models docked onto the IL-22/sIL-22R1 and cmvIL-10/sIL-10R1 complexes (Table S2). This comparison shows the inter-domain angle of sIL-10R2s in the final docking models are almost identical to the sIL-10R2 chain B crystal structure (Fig S2C). In contrast, docking models generated with chain A (Table S2) show considerable deviations away from the starting sIL-10R2 chain A crystal structure (Fig S2B). In practical terms, this corresponds to a  $\sim 10^\circ$  movement of D2 towards (sIL-10R2 chain A) or away (sIL-10R2 chain B) from the D2 domains of sIL-10R1 and sIL-22R1 in the ternary complexes (Figs 4 and 5). Overall, the data suggests chain B reflects the preferred sIL-10R2 D1/D2 orientation required to assemble IL-22 and IL-10 ternary complexes. However, it is possible that the optimal D1/D2 orientation is somewhere within the range of sIL-10R2 domain angles observed in the crystal.



## Supplemental References:

- Jones, B.C., Logsdon, N.J., and Walter, M.R. (2008). Structure of IL-22 bound to its high-affinity IL-22R1 chain. *Structure* 16, 1333-1344.
- Deivanayagam, C.C., Rich, R.L., Carson, M., Owens, R.T., Danthuluri, S., Bice, T., Hook, M., and Narayana, S.V. (2000). Novel fold and assembly of the repetitive B region of the *Staphylococcus aureus* collagen-binding surface protein. *Structure Fold Des* 8, 67-78.
- Logsdon, N.J., Jones, B.C., Allman, J.C., Izotova, L., Schwartz, B., Pestka, S., and Walter, M.R. (2004). The IL-10R2 binding hot spot on IL-22 is located on the N-terminal helix and is dependent on N-linked glycosylation. *J Mol Biol* 342, 503-514.
- McDonald, I.K., and Thornton, J.M. (1994). Satisfying hydrogen bonding potential in proteins. *J Mol Biol* 238, 777-793.
- Wolk, K., Witte, E., Reineke, U., Witte, K., Friedrich, M., Sterry, W., Asadullah, K., Volk, H.D., and Sabat, R. (2004). Is there an interaction between interleukin-10 and interleukin-22? *Genes Immun*.
- Wu, P.W., Li, J., Kodangattil, S.R., Luxenberg, D.P., Bennett, F., Martino, M., Collins, M., Dunussi-Joannopoulos, K., Gill, D.S., Wolfman, N.M., and Fouser, L.A. (2008). IL-22R, IL-10R2, and IL-22BP binding sites are topologically juxtaposed on adjacent and overlapping surfaces of IL-22. *J Mol Biol* 382, 1168-1183.
- Yoon, S.I., Logsdon, N.J., Sheikh, F., Donnelly, R.P., and Walter, M.R. (2006). Conformational changes mediate interleukin-10 receptor 2 (IL-10R2) binding to IL-10 and assembly of the signaling complex. *J Biol Chem* 281, 35088-35096.
